## THE CODING AND SMALL-NON-CODING HIPPOCAMPAL SYNAPTIC RNAome

Robert Eppe<sup>1</sup>, Dennis Krüger<sup>1,2</sup>, Tea Berulava<sup>1</sup>, Gerrit Brehm<sup>3, 4</sup>, Rezaul Islam<sup>1</sup>, Sarah Köster<sup>3, 4</sup> & Andre Fischer<sup>1,4,5\*</sup>

<sup>1</sup>Department for Systems Medicine and Epigenetics, German Center for Neurodegenerative Diseases (DZNE), Von Siebold Str. 3a, 37075, Göttingen, Germany

<sup>2</sup>Bioinformatics Unit, German Center for Neurodegenerative Diseases (DZNE), Von Siebold Str. 3a, 37075, Göttingen, Germany

<sup>3</sup>Institute for X-Ray Physics, University of Göttingen, Göttingen, Germany

<sup>4</sup>Cluster of Excellence "Multiscale Bioimaging: from Molecular Machines to Networks of Excitable Cells" (MBExC), University of Göttingen, Germany

<sup>5</sup>Department of Psychiatry and Psychotherapy, University Medical Center Göttingen, Germany

\*corresponding author: [andre.fischer@dzne.de](mailto:andre.fischer@dzne.de) (ORCID: [0000-0001-8546-1161](https://orcid.org/0000-0001-8546-1161))

### Abstract

Neurons are highly compartmentalized cells that depend on local protein synthesis. Thus, messenger RNAs (mRNAs) have been detected in neuronal dendrites and more recently also at the pre- and postsynaptic compartment. Other RNA species, such as microRNAs, have also been described at synapses where they are believed to control mRNA availability for local translation. Nevertheless, a combined dataset analyzing the synaptic coding and non-coding RNAome via next-generation sequencing approaches is missing. Here we isolate synaptosomes from the hippocampus of young wild type mice and provide the coding and non-coding synaptic RNAome. These data are complemented by a novel approach to analyze the synaptic RNAome from primary hippocampal neurons grown in microfluidic chambers. Our data show that synaptic microRNAs control almost the entire synaptic mRNAome and we identified several hub microRNAs. By combining the *in vivo* synaptosomal data with our novel microfluidic chamber system, we also provide evidence to support the hypothesis that part of the synaptic microRNAome may be supplied to neurons via astrocytes. Moreover, the microfluidic system is suitable to study the dynamics of the synaptic RNAome in response to stimulation. In conclusion, our data provide a valuable resource and hint to several important targets for future experiments.

**Keywords:** mRNA, microRNA, lncRNA, snoRNA, synapse, synaptosomes, gene-expression, RNA-sequencing

## 43 Introduction

44 Neurons are highly compartmentalized cells that form chemical synapses and the plasticity of such synapses is  
45 a key process underlying cognitive function. In turn, loss of synaptic integrity and plasticity is an early event in  
46 neuropsychiatric and neurodegenerative diseases. Synapses are usually far away from the soma, which raises  
47 the question how neurons ensure the supply of synaptic proteins. Theoretical considerations and a substantial  
48 amount of data show that mRNAs coding for key synaptic proteins are transported along dendrites to synaptic  
49 compartments, where they are locally translated into proteins (Doyle & Kiebler, 2011) (Kosik, 2016) (Holt *et al*,  
50 2019) (Fonkeu *et al*, 2019) (Biever, 2020). Hence, several studies investigated the synaptic RNAome via  
51 different approaches. For example, early *in situ* hybridization experiments demonstrated the localization of  
52 specific mRNAs to synapses (Garner *et al*, 1988). In addition, microarray and RNA-seq techniques were used to  
53 study the synpto-dendritic (Cajigas *et al*, 2012) (Ainsley *et al*, 2014) (Farris *et al*, 2019), synpto-neurosomal  
54 (Most *et al*, 2015) and more recently also the synptosomal RNA pool of the mouse brain (Chen *et al*, 2017)  
55 (Hafner, 2019). However, compared to mRNAs, there is comparatively less knowledge about the non-coding  
56 RNAome at synapses. The best known non-coding RNAs are microRNAs which are 19-22 nucleotide long RNA  
57 molecules regulating protein homeostasis via binding to a target mRNA thereby causing its degradation or  
58 inhibition of translation (Gurtan & Sharp, 2013). Several microRNAs have been implicated with synaptic  
59 plasticity and were identified at synapses where they have been linked to the regulation of mRNA stability and  
60 availability for translation (Smalheiser, 2014) (Weiss *et al*, 2015) (Rajman & Schratt, 2017) (Sambandan *et al*,  
61 2017). The combined analysis of the synaptic microRNA/mRNAome is however lacking and knowledge about  
62 other non-coding RNA species is rare. Another issue is that the methods used so far to study synaptic RNAs  
63 from tissue samples do not allow to distinguish between RNAs produced by the corresponding neurons and  
64 RNAs that might be transferred to synapses from other cell types. This question is becoming increasingly  
65 important, since there is emerging evidence for inter-cellular RNA transport and data supporting the  
66 hypothesis that for example glia cells provide neurons with RNA (Sotelo *et al*, 2014) (Jose, 2015). In this study  
67 we isolated synptosomes from the hippocampus of mice and performed from the same preparation total and  
68 smallRNA-sequencing. To complement these data and address the question about the origin of synaptic RNAs  
69 we developed a novel microfluid chamber that not only allowed us to grow primary hippocampal neurons that  
70 form synapses in a pre-defined compartment (Taylor *et al*, 2010), but enabled us to isolate the synaptic  
71 compartments from these chambers using a novel device we call SNIDER (SyNapse Isolation Device by Refined  
72 Cutting) followed by RNA-sequencing. We also show that this novel microfluid chamber is suitable to assay the  
73 dynamics of the synaptic RNAome in response to stimulation. In conclusion, our experiments allowed us for the  
74 first time to build a high-quality synaptic microRNA/mRNA network and suggest key synaptic RNAs, including  
75 lncRNAs and snoRNAs, for future mechanistic studies in the context of the healthy and diseased brain.

76

## 77 Results

### 78 The hippocampal coding and non-coding synptosomal RNAome

79 We isolated high-quality synptosomes from the hippocampus of 3 months old mice, and processed the  
80 corresponding RNA for total and small RNA-sequencing (Fig 1A). After quality control for high confidence  
81 transcripts we could detect 234 mRNA, 6 lncRNAs (excluding sequences that code for predicted genes), 65

82 microRNAs and 37 SnoRNAs (**Fig 1B, tables S1, 2, and 3**). GO-term analysis revealed that the mRNAs reflect  
83 exclusively the pre- and post-synaptic compartment (**Fig 1C**) confirming the quality of our data. Functional  
84 pathway analysis showed that the mRNAs found in our synaptosomal preparations represent key pathways  
85 linked to synaptic function and plasticity (**Fig. 1D**). We also observed a substantial amount of highly abundant  
86 microRNAs present in our synaptosomal preparations (**Table S2**) and wanted to understand the synaptic  
87 regulatory mRNA-microRNA network. To this end, we applied a novel bioinformatic approach and first  
88 generated the mRNA-network using the mRNAs detected at synapses, intersected this network with the  
89 synaptic microRNAome and asked if any of mRNAs within the network represent confirmed microRNA targets.  
90 Our data revealed that the 98% of the synaptic mRNAome is targeted by 95% of the synaptic microRNAs (**Fig**  
91 **1E, F**). These data suggest that the synaptic microRNAome plays an important role in local mRNA availability.  
92 We detected a number of hub microRNAs and especially microRNA-27b-3p, microRNA-22-3p, the cluster  
93 consisting let-7b-5p, let-7c-5p and let-7i-5p as well as microRNA-181a-5p, microRNA-9-5p and microRNA-124-  
94 5p appear as central regulators of the synaptic mRNA pool (**Fig 1E**).

95

#### 96 Comparison of the hippocampal synaptosomal coding and non-coding RNAome to primary hippocampal 97 neurons

98 Compartmentalized microfluidic chambers have been developed to study the pre- and postsynaptic  
99 compartments of neurons. In these chambers, neurons grow their neurites into microgrooves and form  
100 synapses in a narrow compartment, the perfusion channel (Taylor *et al.*, 2010). We hypothesized that such  
101 microfluidic chambers would be a *bona fide* complementary approach to study the synaptic RNAome via RNA-  
102 sequencing. Moreover, since the synapses formed within the perfusion channel of such chambers are not in  
103 contact with any other neural cell type, this approach would also allow us to address the question to what  
104 extent synaptically localized RNAs originate from the corresponding cell or may have been shuttled from  
105 neighboring glia cells, a process that has been specifically proposed for synaptic microRNAs (Prada *et al.*, 2018).  
106 However, a reliable approach to isolate synapses and corresponding RNA for subsequent sequencing from the  
107 perfusion channel of such microfluidic chambers did not exist. Therefore, we generated a modified microfluidic  
108 chamber that allowed us to cut the perfusion channel to harbor the corresponding synapses followed by the  
109 isolation of RNA. Thus, we grew mouse hippocampal neurons in these chambers (**Fig 2A**). For reproducible  
110 cutting we employed a newly-devised instrument we call SNIDER (**SyNapse Isolation Device by Refined Cutting**)  
111 (**Fig 2B, C**) and isolated RNA for total and smallRNA sequencing. When comparing the transcriptome obtained  
112 from the perfusion channel, with corresponding data generated from RNA isolated from primary hippocampal  
113 neurons grown in normal culture dishes, we observed the expected enrichment for a specific subset of RNAs,  
114 representing about 12% of the entire transcriptome (**Fig 2D**). In more detail, the transcriptome of the perfusion  
115 chamber consisted of 1460 mRNAs, 199 lncRNAs, 54 microRNAs and 57 highly expressed snoRNAs of which 22  
116 were also detected in synaptosomes. (**Fig 2E, Supplemental tables S4, 5, 6**). GO-term analysis revealed that the  
117 identified mRNAs represent the synaptic compartment, which is in line with our data obtained from the adult  
118 mouse hippocampus (**Fig 2F**) and further supports the feasibility of our approach. Functional pathway analysis  
119 confirmed that the detected mRNAs code for key synaptic pathways and reflect the high energy demand of  
120 synapses (oxidative phosphorylation). This is also the reason why pathways such as Alzheimer's, Huntington's

121 and Parkinson's disease are identified (**Fig 2G**), since key genes de-regulated in these diseases are linked to  
122 mitochondria function. The direct comparison of the hippocampal synaptic mRNAome from the adult mouse  
123 brain and the mRNAome from primary neurons revealed that almost all mRNAs detected from *in vivo*  
124 synaptosomes, are also found in primary neurons grown in microfluidic chambers (**Fig 2H**), confirming 219  
125 mRNAs as a high-quality and reproducible synaptic mRNAome. The GO-terms and functional pathways linked  
126 to these 219 mRNAs are identical to the data shown in Fig 1C&D. The 1244 mRNAs that were specifically  
127 observed in microfluidic chambers represent also the synaptic compartments and pathways linked to oxidative  
128 phosphorylation, synaptic vesicle cycle and metabolic processes and may therefore reflect the difference of the  
129 synaptic RNAome in the adult brain and cultured primary neurons (**Fig 2I**). In addition, "neuronal projection" is  
130 detected as a significant GO-term, most likely indicating the fact that unlike synaptosomal preparations, the  
131 perfusion channel still contains some neurites. This might also explain that much more lncRNA, namely 199  
132 annotated lncRNAs, are detected in the microfluidic chambers. Pathway analysis suggest that these lncRNA are  
133 mainly linked to mRNAs that control processes associated with oxidative phosphorylation and synaptic  
134 plasticity while comparatively few microRNAs seem to be regulated by the synaptic lncRNAs (Fig S2). Similar to  
135 the *in vivo* data, we found 54 highly expressed microRNAs (**Table S5**). To further study the mRNA/microRNA  
136 network, we used the same approach as described for the synaptosomal data. Our data reveals that the 88% of  
137 the synaptic mRNAome in microfluidic chambers is targeted by 45 (83%) synaptic microRNAs (**Fig 3A**). Taken  
138 together, our data from hippocampal synaptosomes and the novel microfluidic chamber strongly suggest that  
139 the synaptic transcriptome is under tight control of a local microRNA network. Comparison of the *in vivo*  
140 synaptic microRNAome to the data obtained from the microfluidic chambers revealed 17 microRNAs that were  
141 commonly identified at synapses, while 37 microRNAs were specific to the chambers and 48 microRNAs were  
142 only found in the *in vivo* data from hippocampal synaptosomes (**Fig 3B**). When we generated the synaptic  
143 microRNA/mRNA network for the commonly detected 17 synaptic microRNAs and 219 mRNAs (see Fig 2G), we  
144 observed that this core synaptic microRNAome controls 80% (179 of 219) of the core mRNAome (**Fig 3C**).

145

#### 146 Evidence for astrocytic microRNA transport to synapses

147 The finding that 37 microRNAs are exclusively found in synapses from primary neurons is likely due to the  
148 difference between *in vivo* brain tissue and primary neuronal cultures and a similar trend has been observed at  
149 the level of the mRNAs (see **Fig 2G**). More interesting is the observation that 73%, namely 48 out 65, of the  
150 microRNAs detected in hippocampal synaptosomes are not found in microfluidic chambers (see Fig 3B), which  
151 is in contrast to the mRNA data in which almost all of the synaptosomal mRNAs are also found in synapses of  
152 the primary neuronal cultures grown in microfluidic chambers (See Fig 2G). These data may indicate that *in vivo*  
153 some of the synaptic microRNAs are not exclusively produced by the corresponding neuron but might be rather  
154 shuttled to synapses via other neural cell types. In fact, movement of microRNAs between cells is an accepted  
155 mechanism of intra-cellular communication (Jose, 2015). Prime candidate cells to support synapses with  
156 microRNAs are astrocytes that form together with neurons tripartite synapses. A prominent mechanism that  
157 mediates RNA transport amongst neuronal cells is intracellular transport via exosomes (Smythies & Edelstein,  
158 2013). Thus, we compared a previously published dataset in which microRNAs from astrocytic exosomes were  
159 analyzed via a TAQman microRNA-array (Jovičić *et al*, 2013). Indeed, 50% of the microRNAs exclusively



160 detected in hippocampal synaptosomes have also been described in exosomes released from astrocytes (**Fig**  
161 **4A**). When we asked if these 23 microRNAs have mRNA targets detected in synaptosomes we observed that 21  
162 of these microRNAs target in total 197 out of the commonly detected 219 synaptic RNAs (**Fig. 4B**), which is  
163 further confirmed by functional pathway analysis showing that the 21 microRNAs control synaptic genes linked  
164 to the glutamergic synapse, LTP and cAMP signaling (**Fig. 4C**). It is interesting to note that the synaptic mRNAs  
165 not targeted by any of the 21 microRNAs represented functional pathways linked to oxidative phosphorylation  
166 (**Fig. 4D**).

167

#### 168 Synaptic microRNAs are linked to neurodegenerative and neuropsychiatric diseases

169 So far, our data support the view that the synaptic microRNAome plays an important role in neuronal function.  
170 To further strengthen this notion, we decided to ask whether synaptic microRNAs might be particularly de-  
171 regulated in cognitive diseases. To this end we performed a literature search and curated a list of 71  
172 microRNAs that were found to be de-regulated in post-mortem human brain tissue, blood samples or model  
173 systems for Alzheimer's disease, depression, bi-polar disease or schizophrenia. Comparison of this dataset with  
174 our findings from synaptosomes revealed 17 synaptic microRNAs that are de-regulated during cognitive  
175 diseases of which 4 are also found in the microfluidic chambers and 11 were also detected in astrocytic  
176 exosomes, representing an interesting pool of synaptic microRNAs for further studies (**Table 1**).

177

#### 178 Microfluidic chambers are suitable to assay the synaptic RNAome upon neuronal stimulation

179 Our findings suggest that we can study the synaptic RNAome in a reliable manner using our modified microfluid  
180 chambers in combination with SNIDER. This approach also provides a novel tool to study the neuronal-  
181 controlled synaptic RNAome in response to stimulation. To further evaluate this potential, we decided to  
182 expose primary hippocampal neurons grown in microfluidic chambers to KCl treatment followed by the  
183 isolation of the perfusion channel and RNA isolation for RNA-sequencing 2 h later (**Fig 5A**). Our analysis  
184 revealed a substantial number of mRNAs that were increased in the synaptic compartment (**Fig 5B, Table S7**).  
185 Since we can exclude that these mRNAs are shuttled from glia cells, they likely represent part of the  
186 transcriptional response and reflect mRNAs that were transported to synapses, which is feasible within the 2h  
187 time window after treatment. In line with this assumption the up-regulated RNAs exclusively represent the  
188 synaptic compartment (**Fig 5C**). Functional pathway analysis revealed a strong enrichment of RNAs coding for  
189 the ribosome (**Fig 5D**). In fact, 50% of all transcripts that correspond to the ribosomal subunits were increased  
190 at the synapse upon KCL treatment (**Fig 5E**).

191

## 192 **Discussion**

### 193 *The synaptic RNAome*

194 The aim of our study was to provide a high-quality dataset of the synaptic coding and small non-coding  
195 RNAome with a specific focus on microRNAs. Thus, our data represents an important resource for future  
196 studies. To the best of our knowledge our study also provides the first dataset which analyzes in parallel the  
197 coding, non-coding and small non-coding RNAome in hippocampal synapses via next-generation sequencing.  
198 Moreover, we used two different approaches in that we isolate hippocampal synaptosomes from the

199 hippocampus of 3 months-old wild type mice and we developed a microfluidic chamber that in combination  
200 with a novel cutting device allowed us to isolate synaptic compartments for subsequent RNA-sequencing from  
201 primary hippocampal neurons. This chamber combines the advantages of the currently used microfluidic  
202 chambers that allow the specific manipulation of synapses (Taylor *et al.*, 2010), with the ability to isolate the  
203 perfusion channel that harbors synaptic connections. Therefore, this novel microfluidic chamber will allow the  
204 specific manipulation of the synaptic compartment in combination with next-generation sequencing  
205 approaches and should be viewed as a suitable screening tool to study the dynamics of the synaptic RNAome.  
206 Feasibility of this approach was for example demonstrated by our finding that KCL treatment leads to  
207 substantial changes of the synaptic RNAome and future approaches will now employ more physiological  
208 manipulations and study the synaptic RNAome in disease models. It is noteworthy, that most of the mRNAs up-  
209 regulated at the synapse upon stimulation represent key components of the ribosome, which is in agreement  
210 with the importance of local mRNA translation (Holt *et al.*, 2019).

211 In line with previous data we identified a substantial number of mRNAs that almost exclusively represent the  
212 synaptic compartment and key signaling pathways linked to synaptic integrity and plasticity. It is interesting to  
213 note that the mRNA coding for the amyloid-precursor protein (APP), a key factor in Alzheimer's disease (AD)  
214 pathogenesis, was also found at synapses (see Table S1). To our knowledge, this observation has not been  
215 explicitly reported before but is in line with the physiological function of wild-type APP at synapses (Hefter et  
216 al., 2020). Generally, we detected more mRNAs within the dataset obtained from primary neurons when  
217 compared to the synaptosomal preparation. This observation likely reflects the difference between the *in vivo*  
218 preparation of hippocampal tissue and cultured primary neurons. Another important consideration is that  
219 synapses likely differ depending on the distance to the soma, an issue that cannot be addressed when isolating  
220 synaptosomes, while the RNAome detected in the microfluidic chambers represent synapses that are most  
221 distant to the corresponding somata. Similar important is the fact that the preparation from the perfusion  
222 channel of our microfluid chamber still contains some neurites. Thus, the corresponding RNAome also includes  
223 dendritic mRNAs. This view is supported by previous data in which the mRNA pool was analyzed from neuropil  
224 or synapto-dendritic compartments. For example, 2550 mRNAs were detected in hippocampal neuropil from  
225 mice (Cajigas *et al.*, 2012), and 1875 mRNAs were identified when ribosome-bound mRNA was analyzed in the  
226 same region (Ainsley *et al.*, 2014). We observed only 234 mRNAs in hippocampal synaptosomes but we suggest  
227 that these mRNAs represent a high-quality dataset. Thus, we only report mRNAs that passed rigorous quality  
228 control and exhibit a substantial amount of sequencing reads. The quality of these data is further confirmed by  
229 the fact that almost all of the synaptosomal mRNAs, namely 219, are also detected within the RNA-seq dataset  
230 we obtained from the microfluidic chambers. The most comparable mRNA dataset to our *in vivo* approach is a  
231 recent study that employed FACS to isolate synaptosomes from the mouse forebrain (Hafner, 2019) and also  
232 reported raw data on the generic synaptosomes. It is important to note that this study employed a different  
233 analysis pipeline and reported all transcripts that map with >25% of the read length when using the STAR-  
234 aligner tool, while we consider only transcripts that map with at least >66%. Nevertheless, we observed that  
235 the top 500 mRNAs reported by Hafner et al. almost completely overlapped with our dataset. Namely 209 of  
236 the 234 mRNAs that we reported for hippocampal synaptosomes are also found in the Hafner et al. dataset  
237 from mouse forebrain synaptosomes (**table S8**), further supporting the quality of our dataset and

238 strengthening the view that synaptic mRNAs play a critical role in neuronal function. We also report the  
239 detection of lncRNAs in datasets obtained from synaptosomes and microfluidic chambers but for now  
240 restricted the presented data to the currently annotated lncRNAs. We also detected lncRNAs that are currently  
241 still referred to as “predicted” and await further confirmation. Therefore, we encourage researchers to further  
242 explore our raw data as annotation of the genome improves. The presence of lncRNA in synaptosomes is in line  
243 with previous data (Chen *et al.*, 2017) but it is interesting to note that more lncRNAs were found in the  
244 microfluidic chambers when compared to the *in vivo* synaptosomes. A similar trend has been observed for  
245 mRNAs and might be due to the fact that the RNA preparation from the microfluid chambers also contain some  
246 dendritic RNA. Our data suggest that the detected lncRNAs regulate processes associated with oxidative  
247 phosphorylation and synaptic plasticity and may also affected the function of selected microRNAs. Although  
248 these observations need to be further studied, it is interesting to note that metastasis-associated lung  
249 adenocarcinoma transcript 1 (Malat1) appeared as one hub lncRNA at synapses. This is in line with a previous  
250 study showing that knocking down MALAT1 in hippocampal neurons decreases the number of synapses,  
251 although it has to be mentioned that the authors linked this finding to the role of MALAT1 on gene-expression  
252 control (Bernard *et al.*, 2010). The presence of snoRNAs at synapses is also highly interesting and in line with a  
253 previous study that reported snoRNAs in synaptosomes (Smalheiser *et al.*, 2014). Moreover, there was a  
254 substantial overlap of the snoRNAs detected in synaptosomes and in primary neurons (60% of the  
255 synaptosomal snoRNAs were also detected in microfluidic chambers). Most of the commonly detected  
256 snoRNAs were of the C/D box (49%) or H/ACA-box type (17%) that regulate RNA-methylation and  
257 pseudouridylation of mainly ribosomal RNAs (Bratkovič *et al.*, 2020), which is in line with the presence of  
258 ribosomes at synapses (Holt *et al.*, 2019). However, we also identified snoRNAs that cannot be classified in  
259 either category (35%) that warrant further investigation. Some of the synaptic snoRNAs have been associated  
260 to additional processes and for example SNORD50, SNORD83B or SNOR27 have been linked to mRNA 3’  
261 processing and post-transcriptionally gene-silencing (Bratkovič *et al.*, 2020), while SNORD115 affects mRNA  
262 abundance and is genetically linked to the Prader-Willi-syndrome, a rare genetic disease leading to intellectual  
263 disability (Cavaillé, 2017).

264

#### 265 *A synaptic mRNA/microRNA network.*

266 We detected a substantial number of microRNAs in hippocampal synaptosomes and in the microfluidic  
267 chambers. The presence of mature microRNAs at synapses is in line with previous reports that employed RT-  
268 PCR to study neurites of primary hippocampal neurons (Kye *et al.*, 2007), micro-array-technology to analyze  
269 microRNAs in the synapto-neurosomes isolated from the forebrain of mice (Lugli *et al.*, 2008) or more recently  
270 also smallRNA-sequencing and NanoString analysis of hippocampal neuropil or synaptosomes (Smalheiser *et*  
271 *al.*, 2014) (Sambandan *et al.*, 2017). Comparison of the dataset generated by Sambandan and colleagues  
272 revealed that out of the 65 microRNAs we detect, 57 were also reported in this previous study. These data  
273 further strengthen the view that microRNAs play an important role at synapses and suggest that our dataset  
274 represents a high quality synaptic microRNAome as a resource for future studies. To the best of our knowledge,  
275 our study is the first that provides a synaptic coding and small non-coding RNAome from the same preparation  
276 thereby allowing us the address the role of the synaptic microRNAome at the systems level. We used the data

277 to develop a novel tool which is first fed with the mRNA data to parse multiple databases containing  
278 experimentally validated interactions and thereby building a high confidence mRNA network of the synapse  
279 (See methods for more details). We intersected this mRNA network with the confirmed targets of all  
280 microRNAs, which are detected within the same sample to build the synaptic microRNA/mRNA network.  
281 Overall, our data suggest that up to 98% of the synaptic mRNAome is controlled by synaptic microRNAs,  
282 suggesting that essentially all synaptic localized mRNAs are potentially regulated via the synaptic microRNAs.  
283 Considering that mRNA transport to synapses is an energy-demanding and highly controlled process (Doyle &  
284 Kiebler, 2011) it is likely that synaptic microRNAs do not degrade their mRNA targets but rather control their  
285 availability for local translation, a question that should be studied in future experiments at the systems level.  
286 Another important observation is that many of the synaptic microRNAs are de-regulated in cognitive diseases  
287 (see table 1) that often start with synaptic dysfunction. In addition, there is increasing interest in circulating  
288 microRNAs as biomarkers for cognitive diseases (Rao *et al*, 2013) (Rupaimoole & Slack, 2017). The fact that  
289 microRNAs have also been reported in synaptic vesicles (Xu *et al*, 2013) and in exosomes derived from  
290 neuronal cultures (Jain *et al*, 2019) suggest a potential path how pathological microRNA changes observed in  
291 the brain may also manifest in circulation. Hence, the various CNS clearance systems (Plog & Nedergaard,  
292 2018) might transport such vesicles to the circulation, a hypothesis that should be further studied. In the same  
293 context, there is substantial data to suggest that microRNAs regulate biological processes across cell-types and  
294 even organs (Valadi H, 2007) (Jose, 2015). Intriguingly, in the perfusion channel of microfluidic chambers, which  
295 are free of any somata and only contain distal synapses and some neurites, substantially less microRNAs are  
296 existent than in the synaptosomes. These microRNAs significantly overlapped with the ones detected in  
297 exosomes released by astrocytes (Jovičić *et al*, 2013). It is therefore tempting to speculate that within the  
298 tripartite synapse astrocytes support synapses with additional microRNAs that help to control the synaptic  
299 mRNA pool. Support for this view stems also from the observation that the 3 most significant functional  
300 pathways controlled by the synaptosomal microRNAome are “Glutamatergic synapse”, “cAMP signaling” and  
301 “long-term potentiation”, which are identical to the top 3 pathways controlled by the microRNAs that are  
302 potentially shuttled to synapses via astrocytes. These data underscore the importance of the corresponding  
303 mRNA pool and may suggest that microRNAs supplied to synapses by other cell types might suppress  
304 translation of the most relevant local mRNAs rather than degrading a few selected RNAs. Our data allowed us  
305 to identify a number of synaptic hub microRNAs (e.g. see Fig 1E and F) and the functional analysis of these  
306 microRNAs would be an important task for future studies. Of particular importance would be microRNAs that  
307 are de-regulated in cognitive diseases. Support for this view stems from recent data on microRNA-181a-5p, a  
308 hub in our synaptic network, that is de-regulated in neurodegenerative and neuropsychiatric diseases (Stepniak  
309 *et al*, 2015) (Ansari, 2019) and was found to be processed at synapses upon neuronal activity (Sambandan *et al*,  
310 2017). The finding that most microRNAs of the let-7 family are highly abundant at synapses and control a  
311 large set of mRNAs is also interesting, since these microRNAs have been observed in several CNS-  
312 related pathologies (Derkow *et al*, 2018) while comparatively little is known on their role on the adult brain.  
313 Another hub microRNAs is miR-125b-5p that is de-regulated in Alzheimer’s disease and causes memory  
314 impairment in mice when elevated in the hippocampus of mice (Banzhaf-Strathmann *et al*, 2014), yet its role at  
315 the synapse remains elusive. Similarly interesting is miR-128-3p, that is de-regulated in various

316 neuropsychiatric and neurodegenerative diseases and recent data suggest that inhibition of microRNA-128-3p  
317 can ameliorate AD pathology (Liu *et al.*, 2019).

318 In conclusion, our study provides the synaptic RNAome and is thus a valuable resource for future studies. Our  
319 data furthermore support the importance of synaptic mRNAs and microRNAs and we introduce a new  
320 microfluidic chamber that will allow researchers to combine the power of a specific analysis and manipulation  
321 of the synaptic compartment (Taylor *et al.*, 2010) with RNA-sequencing approaches.

322

## 323 **Materials & Methods**

### 324 *Animals*

325 Three months old male C57B/6J mice were purchased from Janvier Labs. All animals were housed in standard  
326 cages on 12h/12h light/dark cycle with food and water ad libitum. All experiments were performed according  
327 to the protocols approved by local ethics committee

328

### 329 *Isolation of hippocampal synaptosomes for RNA-sequencing.*

330 To obtain sufficient RNA for sequencing of hippocampal synaptosomes we isolated the hippocampi from sixty  
331 3-month-old wild type mice. Twenty bi-lateral hippocampi were pooled as 1 sample to obtain 3 independent  
332 samples that were further processed to isolate high-quality synaptosomes using a previously described  
333 protocol (Boyken *et al.*, 2013). In brief, hippocampi were homogenized by 9 strokes at 900 rpm in sucrose buffer  
334 and centrifuged at 4° for 2min at 5000rpm (SS34). Supernatants were further centrifuged at 4° for 12min at  
335 11000rpm. Pellets were loaded onto a Ficoll gradient and centrifuged at 4° for 35min at 22500rpm (SW41). The  
336 interface between 13% and 9% Ficoll was washed by further centrifugation and then pelleted by 8700rpm for  
337 12min in a SS34 rotor. Resuspended synaptosomes were then centrifuged on a sucrose gradient for 3h at  
338 28000rpm (SW28). Finally, synaptosomes were fractioned via the Gilson Minipuls and 21 fractions were  
339 collected and analyzed by dot blotting. For this, from each fraction, 2µl of sample were pipetted on  
340 nitrocellulose membrane, and dried for 5min. Blocking of unspecific signal was done by 5% low fat milk in TBST  
341 for 10 min. Antibodies against Synaptophysin and PSD95 were applied for 15min, then the membrane was  
342 washed three times for 3min each, in TBST with 5% milk. Secondary antibody was applied for 15min.  
343 Afterwards membrane was washed again three times with TBST without milk before being imaged. Only 5  
344 fractions from each preparation showed a signal for synaptophysin and PSD95 ensuring the presence of high-  
345 quality synaptosomes and were therefore processed for total and small RNA-sequencing.

346

### 347 *Production of microfluidic chambers*

348 To isolate synapses and corresponding RNA for subsequent sequencing from the perfusion channel of currently  
349 employed microfluidic chambers (Taylor *et al.*, 2010) was not possible. Therefore, we generated a microfluidic  
350 chamber that allowed us to cut the perfusion channel by using polydimethylsiloxan (PDMS) for the chamber  
351 and the corresponding substrate (Fig S1). Pilot studies showed that unlike the commonly used microfluidic  
352 chambers (Taylor *et al.*, 2010), the usage of PDMS as a substrate to bind the chambers on allowed us to cut the  
353 perfusion channel. In more detail, the microfluidic chambers were designed using AutoCAD 2017. The overall  
354 layout was similar to the version reported by Taylor and colleagues (Taylor *et al.*), yet for more yield of synaptic

355 RNAs the length of the chamber was increased, with more microgrooves and a wider synaptic compartment to  
356 allow easier alignment during cutting. Layouts were translated into photolithography masks by Selba.  
357 Production of silicon wafers was done with two layers. The first layer was made by applying 2 ml Photoresist  
358 SU-8-2025 on 50.8mm diameter silicon wafers and running the spin coater with the following settings: 1.) 15  
359 sec, 500 rpm, 100 ramp 2.) 100sec, 4000 rpm, 50 ramp. To prebake, wafers were put on a 65° heating plate for  
360 1 min, then for 15min on a 95° heating plate. For depositing the first layer, the mask with the microgrooves  
361 pattern was inserted into the MJB4 mask aligner; exposure was set to 9 sec under light vacuum conditions.  
362 Afterwards wafers were postbaked at 65° for 1 min and 5 min at 95°C.  
363 Subsequently 3 ml of the second photoresist SU-8-2050 were added on top and spread thin with the following  
364 spincoater protocol: 1.) 15 sec, 100 ramp, 500 rpm 2) 60 sec, 900 rpm, 50ramp. This time prebaking was done  
365 with 1min at 65° and minimum of 30min at 95°. The second layer was aligned to the microgrooves using the  
366 microscope of the mask aligner. UV light exposure lasted 19 sec, in the soft contact setting. After postbaking as  
367 described for the first layer, wafers were developed for 10min or more in mrDev600 with the aid of  
368 ultrasonication. PDMS (SYLGARD™ 184 Silicone Elastomer Kit) was used to manufacture the chambers as well  
369 as the bottom substrates. Sylgard components were mixed 10:1, mixed with a 1ml pipette tip, poured over the  
370 wafers that were placed in 6cm diameter Petri dishes and very thinly (1-2mm high) onto 10cm dishes.  
371 Degassing was done for minimum 15 minutes in a desiccator under vacuum. Afterwards wafers and bottom  
372 parts were transferred to a 70° oven and cured for 2h. Chambers and bottom parts were cut out by a scalpel,  
373 holes in the chambers were punched by biopsy punchers of 6mm and 8mm diameter and bottom parts were  
374 cut into smaller pieces to hold one chamber each. To clean off dust, the pieces off of dust they were placed in  
375 an ultrasonic bath for 10 min and then dried on a heatplate at 70°. PDMS can be bound to PDMS covalently  
376 under oxygen plasma conditions; a tesla-coil type device, the Corona plasma treater from Blackhole lab, was  
377 used to this end. The plasma treater was hovered slowly 2cm above the chambers (bottom side up), going back  
378 and forth to cover the whole area by discharges for 30sec, then the same was done to the bottom part.  
379 Thereupon both parts were brought together and pressed very slightly to ensure complete contact. Covalent  
380 bond forming was enhanced by placing the so assembled chamber in the oven at 70° for 10min. Subsequently  
381 chambers were filled with PBS or borate buffer to maintain hydrophilic properties. For chambers that were  
382 supposed to be imaged, chambers were not treated with plasma; rather chambers were assembled to the  
383 PDMS or glass substrate under the biosafety cabinet by simply pressing both pieces together. Once assembled,  
384 chambers were brought to a biosafety cabinet and washed with 70% ethanol, then twice with water. Coating  
385 on PDMS worked best when done with 0.5 mg PDL in borate buffer overnight. Visual inspection under the  
386 microscope should make sure that no bubbles are present in the chambers. Great care needs to be taken when  
387 washing to not remove the coating. Liquid should be never removed with a suction pump sucking liquid directly  
388 from the channels, instead liquid should be removed by pointing the pipette at the wall of open reservoirs.  
389 Washing was done twice with PBS, 80µl per top reservoir, allowing for the liquid to flow into the down  
390 reservoir. Perfusion reservoirs were washed by applying 50µl in each well, one at a time and waiting for 5min in  
391 between. Once all PBS was removed from the open reservoirs 80µl of medium was added per top reservoir,  
392 allowing for the liquid to flow into the down reservoir. This process was repeated once, before chambers were  
393 left over night in the incubator before seeding, to ensure proper hydrophilicity. For easier handling always two

394 chambers were put together in a 10cm dish, with two lids of 15ml falcon tubes filled with water next to them,  
395 to reduce the evaporation from the chambers themselves.

396

#### 397 *Primary hippocampal neuronal cultures*

398 Pregnant CD1 mice were sacrificed under anesthesia by cervical dislocation at E16 or E17. Brains from embryos  
399 were extracted and their hippocampi collected. Processing was done using the Papain kit from Worthington,  
400 and cells were counted and diluted to a density of 5 Million per ml. Seeding was done with the following  
401 pipetting scheme in order to make sure, most cells reach the microgrooves but do not enter them. 10 $\mu$ l of cell  
402 suspension containing 70.000 cells were injected in the channels from the top wells. We started with the  
403 axonal side. A second pipetting step with 5 $\mu$ l added to the channels from the bottom wells, after inspection of  
404 cells under the microscope. After 10 minutes, a similar seeding was performed for the dendritic side. One hour  
405 later each well was filled up to 100 $\mu$ l. The next day another 100 $\mu$ l were pipetted into each well. Visual  
406 inspection under a microscope was necessary to do several rounds of seeding with decreasing volume to made  
407 sure the desired spread of cells was achieved. After two hours reservoirs of the chambers were filled up with  
408 medium to 100 $\mu$ l each, by pipetting an additional 70 $\mu$ l simultaneously in both reservoirs per side, while not  
409 adding more medium to the perfusion. We used Neurobasal Plus with GlutaMax, Penicilin/Strep and B27 Plus  
410 supplement for better viability. Parallel to chambers, normal 12-well dishes, coated with PDL in borate  
411 overnight and washed three times with water, were cultured at 260.000 cells per well; those served as standby  
412 cultures. Since medium evaporation can happen quickly in the chambers, every 2-3 days medium from these  
413 standby cultures was filtered by a 0.22 $\mu$ m syringe filter and then added to the chambers. For the KCl  
414 stimulation, around 50 $\mu$ l of medium was collected from each reservoir of the chambers, mixed with KCl as to  
415 result in a final concentration of 50mM when given back to the chamber and then incubated for 2h before RNA  
416 isolation.

417

#### 418 *Harvesting of synaptic RNAs from microfluidic chambers: SNIDER*

419 In order to parallel cut the PDMS substrate, we designed a machine consisting of a blade-holding arm on a ball-  
420 bearing rail, allowing frictionless mobility in one dimension. A screw-driven spring drives the razorblades height  
421 position and allows for controlling the penetration depth of the blades into the PDMS. The non-cutting corners  
422 of the razorblade were removed with a plunger to only have one accessing point of the blades into the PDMS.  
423 Small metal plates were put in between the blades and served as spacers, increasing the inter-blade distance to  
424 900  $\mu$ m. On the day of harvest cells in the chambers were washed once with PDMS and flipped upside down.  
425 Great care was taken to maintain a RNase free environment by prior cleaning of all tools and instruments with  
426 RNasezap and 70% EtOH afterwards. To have an endpoint for the long parallel cut we introduced with a  
427 scalpel two horizontal cuts between the outer perfusion wells and the upper left respectively upper right well  
428 that met at the perfusion stream. Then chambers were aligned by their perfusion stream on a marked line of  
429 the device. By close visual inspection the blades were lowered just before entering the PDMS material and  
430 blades were brought in parallel to the synaptic compartment. Blades were then lowered 2mm deep into the  
431 substrate just before the perfusion outlet and then the metal lever was pulled backwards, moving the blades  
432 towards the perfusion wells until the parallel cut met the V-shaped cut induced by scalpel earlier. With a pair of

433 tweezers, the synaptic compartment was taken out and put into cell lysis buffer solution of GenElute Sigma kit,  
434 whereupon we followed the manufactures protocol under 1C to isolate total RNA, including small RNAs.

435

#### 436 *RNA sequencing*

437 The synaptosomal RNA samples were split into halves; one was further processed to obtain total RNA libraries  
438 using the Illumina Truseq total RNA kit, the other half was used for small RNA sequencing using the NEBNext  
439 Small RNA Library Prep Kit as described before (Benito *et al*, 2015). For total RNA sequencing of RNA from  
440 microfluid chambers, we always pooled two samples and libraries were created with Takara's SMARTer  
441 Stranded Total RNA-Seq Kit v2 - Pico Input Mammalian. small RNA libraries were generated using Takara's  
442 SMARTer smRNA-Seq Kit for Illumina. To verify the library and sequencing procedure we added spike-in RNAs  
443 from the QIAseq miRNA Library QC kit prior to library creation.

444

#### 445 *Bioinformatic analysis*

446 Sequencing data was processed using a customized in-house software pipeline. Illumina's conversion software  
447 bcl2fastq (v2.20.2) was used for adapter trimming and converting the base calls in the per-cycle BCL files to the  
448 per-read FASTQ format from raw images. Quality control of raw sequencing data was performed by using  
449 FastQC (v0.11.5). Trimming of 3' adapters for smallRNASeq data was done using cutadapt (v1.11.0)  
450 (<https://doi.org/10.14806/ej.17.1.200>). The mouse genome version mm10 was used for alignment and  
451 annotation of coding and non-coding genes. Small RNAs were annotated using miRBase (Griffiths-Jones, 2006)  
452 for miRNAs and snOPY (Yoshihama *et al*, 2013) for snoRNAs. For totalRNASeq reads were aligned using the  
453 STAR aligner (v2.5.2b) (Dobin *et al*, 2013) and read counts were generated using featureCounts (v1.5.1) (Liao *et al*,  
454 2014). For smallRNASeq reads were aligned using the mapper.pl script from mirdeep2 (v2.0.1.2)  
455 (Friedländer *et al*, 2012) which uses bowtie (v1.1.2) (Langmead & Salzberg, 2012) and read counts were  
456 generated with the quantifier.pl script from mirdeep2. All read counts were normalized according to library size  
457 to transcript per million (TPM). We used a TPM cutoff of 1000 reads for smallRNAs to make sure that these  
458 smallRNAs were considerably detected up to an average raw count of 10 reads. To account for differences in  
459 sequencing depth between synaptosomal mRNAs (average of 6mio unique reads per lane) and mRNAs from  
460 microfluidic chambers (average of 20mio unique reads per lane) we applied a cutoff of 50 and 100 normalized  
461 reads, respectively. Differential expression analysis was performed with the DESeq2 (v1.26.0) R (v3.6.3)  
462 package (Love *et al*, 2014), here unwanted variance was removed using RUVSeq (v1.20.0) (Risso *et al*, 2014).  
463 Networks were build using Cytoscape (v3.7.2) (Shannon *et al*, 2003) based on automatically created lists of  
464 pairwise interactors. We used in-house Python scripts to detect interactions between expressed non-coding  
465 RNAs (miRNAs, lncRNAs, or snoRNAs) and coding genes; interaction information was collected from six  
466 different databases: NPInter (Teng *et al*, 2020), RegNetwork (Liu *et al*, 2015), Rise (El Fatimy *et al*, 2018),  
467 STRING (Szklarczyk *et al*, 2019), TarBase (Karagkouni *et al*, 2018), and TransmiR (Tong *et al*, 2019). All  
468 interactions classified as weak (if available) were excluded. The lists of pairwise interactors were loaded into  
469 Cytoscape and all nodes connected by only one edge were removed to build the final network, respectively.

470

#### 471 *Imaging*



472 Cells were fixed in 4% PFA in PBS plus 1 $\mu$ M MgCl<sub>2</sub>, 0.1  $\mu$ M CaCl<sub>2</sub> and 120mM Sucrose. Our imaging setup  
473 consists of a Leica DMI8 microscope that is equipped with a STEDYcon. Phase contrast images were obtained  
474 using the Leica in its normal mode, with the Leica DMI8 software. All other fluorescent images were taken with  
475 the STEDYcon in either confocal or STED mode. Antibodies: PSD95 (Merck - MABN 68) and Synaptophysin 1  
476 (Synaptic Systems 101 004), both diluted to 1:400. Secondary antibodies were StarRED (Abberior, STRED-1001-  
477 500UG) and Alexa Fluor 633 Anti-Guinea Pig (Invitrogen, A21105) both diluted to 1:400. DAPI was applied for  
478 1min for counterstaining.

479

#### 480 **Availability of data**

481 All sequencing data are available via GEO database. [GSE159248](https://www.ncbi.nlm.nih.gov/geo/query/acc.cgi?acc=GSE159248):  
482 <https://www.ncbi.nlm.nih.gov/geo/query/acc.cgi?acc=GSE159248>

483

#### 484 **Code availability**

485 Not applicable

486

#### 487 **Compliance with Ethical Standards**

488 The authors declare no conflict of interest. This work includes experiments with mice. All described  
489 experiments approved by the local animal care committee.

490

#### 491 **Consent to participate**

492 Not applicable since this study does not involve research on human subjects.

493

#### 494 **Consent for publication**

495 Not applicable since this study does not involve research on human subjects.

496

#### 497 **Funding**

498 This work was supported by the following third-party funds to AF: the ERC consolidator grant DEPICODE  
499 (648898), funds from the SFB1286 (B06), the DFG under Germany's Excellence Strategy - EXC 2067/1  
500 390729940 the and funds from the German Center for Neurodegenerative Diseases (DZNE).

501

#### 502 **Author contribution**

503 All authors contributed to the study conception and design. RE conducted cell culture and RNA-sequencing  
504 experiments, build microfluidic chambers and analyzed data. DMK performed bioinformatic analysis, TB  
505 isolated synaptosomes, GB and SK helped with the generation of microfluidic chambers, RI performed total  
506 RNA-sequencing from hippocampal neuronal cultures in normal culture dishes and curated the disease-related  
507 list of microRNAs, AF supervised the project and wrote the manuscript.

508

#### 509 **Acknowledgments**

510 RE is a members of the international Max Planck Research School (IMPRS) for Neuroscience, Göttingen. We  
511 thank Mike Zippert and Reinhard Hildebrandt for the construction of SNIDER. This work was supported by the

512 following third-party funds to AF: the ERC consolidator grant DEPICODE (648898), funds from the German  
513 research foundation (DFG) SFB1286 (B06) and funds from the German Center for Neurodegenerative Diseases  
514 (DZNE). SK is supported by the DFG via SFB1286 (B02). AF and SK are supported by funds from the DFG under  
515 Germany's Excellence Strategy - EXC 2067/1 390729940.

516

### 517 **Figure legends**

518 **Figure 1: The coding and small-non-coding RNAome of hippocampal synaptosomes. A.** Experimental scheme.  
519 **B.** Bar graph showing the detected RNA species. **C.** GO-analysis showing that the identified mRNAs represent  
520 the synaptic compartment. **D.** KEGG-pathway analysis showing that the synaptic mRNAome consists of  
521 transcripts that are essential for the function of hippocampal synapses. **E.** microRNA-mRNA interaction  
522 network of the synaptic RNAome. Red circles represent the identified mRNAs that form a highly connected  
523 network, while blue circles indicate the detected microRNAs. Only the names of the top hub microRNAs are  
524 shown. **F.** Heat map showing the synaptic microRNAome ranked by their confirmed mRNA targets that were  
525 found at synapses.

526

527 **Figure 2: Analyzing the synaptic RNAome in microfluidic chambers via RNA-sequencing. A.** Microfluidic  
528 chambers build from PDMS. Left panel shows the scheme of the microfluidic chamber indicating the perfusion  
529 channel in which most of synapses form. The principle is based on chambers first reported by Taylor and  
530 colleagues (Taylor *et al.*, 2010) but has been substantially modified (See Fig S1 for more details). The middle  
531 panel shows the bright-field image of neurons growing in these chambers and the right panel shows  
532 immunostaining for PSD-95 and Synaptophysin within the perfusion channel (upper image) and the part of the  
533 chambers that contains the cell bodies (lower image). **B** Scheme and image showing our newly devised tool for  
534 cutting the perfusion channel from the microfluidic chambers, named SNIDER. **C.** Schematic illustration of the  
535 cutting of the microfluidic chambers. **D.** Venn diagram showing the comparison of the total RNA-seq data  
536 obtained from primary hippocampal cultures grown in normal dishes (primary neuronal culture) and  
537 corresponding data obtained from the perfusion channel isolated from microfluidic chambers in which primary  
538 hippocampal neurons were grown. **E.** Bar chart showing the detected RNA species. **F.** GO-analysis showing that  
539 the identified mRNAs represent the synaptic compartment. **G.** KEGG-pathway analysis showing that the  
540 synaptic mRNAome consists of transcripts that are essential for the function of hippocampal synapses. **H.** Venn  
541 diagram showing the overlap of mRNAs detected in hippocampal synaptosomes and in microfluidic chambers.  
542 **I.** Upper panel: GO-analysis showing that the 1244 mRNAs specifically detected in microfluidic chambers  
543 represent the synaptic compartment and "cell projection". Lower panel: KEGG-pathway analysis of the same  
544 dataset.

545

546 **Figure 3: A core synaptic microRNAome. A.** microRNA-mRNA interaction network of the synaptic RNAome  
547 detected in microfluidic chambers. Red circles represent the identified mRNAs that form a highly connected  
548 network, while blue circles indicate the detected microRNAs that control this network. Only the names of the  
549 top hub microRNAs are shown. **B.** Venn diagram comparing microRNAs detected in microfluidic chambers  
550 (Chambers) and synaptosomes. **C.** microRNA-mRNA interaction network of the 219 synaptic mRNAs commonly

551 detected in synaptosomes and microfluidic chambers and the 17 commonly detected microRNAs. Only the  
552 names of the top hub microRNAs are shown.

553

554 **Figure 4: Comparing microRNAs from astrocytic exosomes to the synaptic RNAome.** A. Venn diagram  
555 comparing the 48 microRNAs exclusively detected in synaptosomes to the list of microRNAs found in astrocytic  
556 exosomes. B. microRNA-mRNA interaction network showing that 203 of the commonly detected 219 mRNAs  
557 and 21 of the 23 microRNAs found in synaptosomes and astrocytic exosomes form an interaction network.  
558 Only the names of the top hub microRNAs are shown. C. KEGG-pathway analysis of the 203 mRNAs within the  
559 network. D. KEGG pathway analysis of the 16 common synaptic mRNAs that are not targeted by the  
560 overlapping microRNAs shown in (A).

561

562 **Figure 5: The synaptic mRNAome upon stimulation.** A. Experimental scheme. B. Volcano plot showing a  
563 substantial up-regulation of synaptic RNAs upon KCL treatment. C. GO-analysis showing that the identified  
564 mRNAs represent the synaptic compartment. D. KEGG-pathway analysis showing that the changes of the  
565 synaptic mRNAome upon KCL treatment represent transcripts mainly linked to ribosomal function. E. Upper  
566 panel shows images of the KEGG pathway for “ribosome”. Colored subunits represent transcripts significantly  
567 increased. Lower panel: bar chart showing that 50% of the genes that comprise the “ribosome” KEGG-pathway  
568 are increased at the synaptic compartment upon KCL treatment.

569

570

## 571 Literature

572 Ainsley JA, Drane L, Jacobs J, Kittelberger KA, Reijmers LG (2014) Functionally diverse dendritic mRNAs  
573 rapidly associate with ribosomes following a novel experience. *Nature communications* 5: 4510  
574 Ansari A, Maffioletti, E., Milanesi, E., Marizzoni, M., Frisoni, G. B., Blin, O., Richardson, J. C., Bordet, R.,  
575 Forloni, G., Gennarelli, M., Bocchio-Chiavetto, L., & PharmaCog Consortium (2019) miR-146a and miR-181a  
576 are involved in the progression of mild cognitive impairment to Alzheimer's disease. *Neurobiology of Aging* 82:  
577 102-109  
578 Banzhaf-Strathmann J, Benito E, May S, Arzberger T, Tahirovic S, Kretschmar H, Fischer A, Edbauer D  
579 (2014) MicroRNA-125b induces tau hyperphosphorylation and cognitive deficits in Alzheimer's disease. *EMBO*  
580 *J* 33: 1667-1680  
581 Benito E, Urbanke E, Barth J, Halder R, Capece V, Jain G, Burkhardt S, Navarro M, Schutz AL, Bonn S *et al*  
582 (2015) Reinstating transcriptome plasticity and memory function in mouse models for cognitive decline. *J Clin*  
583 *Invest* 125: 3572-3584  
584 Bernard D, Prasanth KV, Tripathi V, Colasse S, Nakamura T, Xuan Z, Zhang MQ, Sedel F, Jourden L, Couplier  
585 F *et al* (2010) A long nuclear-retained non-coding RNA regulates synaptogenesis by modulating gene  
586 expression. *The EMBO journal* 29: 3082-3093  
587 Biever A, Glock, C., Tushev, G., Ciirdaeva, E., Dalmay, T., Langer, J. D., & Schuman, E. M. (2020).  
588 Monosomes actively translate synaptic mRNAs in neuronal processes. *Science* (New York, N.Y.), 367(6477),  
589 eaay4991. (2020) Monosomes actively translate synaptic mRNAs in neuronal processes. *Science* 3677.  
590 Boyken J, Grønborg M, Riedel D, Urlaub H, Jahn R, Chua JJ (2013) Molecular profiling of synaptic vesicle  
591 docking sites reveals novel proteins but few differences between glutamatergic and GABAergic synapses.  
592 *Neuron* 78: 285-297  
593 Bratkovič T, Božič J, Rogelj B (2020) Functional diversity of small nucleolar RNAs. *Nucleic acids research*.  
594 *Nucleic acids research* 48: 1627-1651  
595 Cajigas JJ, Tushev G, Will TJ, tom Dieck S, Fuerst N, Schuman EM (2012) The local transcriptome in the  
596 synaptic neuropil revealed by deep sequencing and high-resolution imaging. *Neuron* 74: 453-466  
597 Cavallé J (2017) ox C/D small nucleolar RNA genes and the Prader-Willi syndrome: a complex interplay. *.*  
598 *Wiley interdisciplinary reviews RNA* 8: <https://doi.org/10.1002/wrna.1417>

599 Chen BJ, Ueberham U, Mills JD, Kirazov L, Kirazov E, Knobloch M, Bochmann J, Jendrek R, Takenaka K,  
600 Bliim N *et al* (2017) RNA sequencing reveals pronounced changes in the noncoding transcriptome of aging  
601 synaptosomes. *Neurobiology of aging* 56: 67–77  
602 Derkow K, Rössling R, Schipke C, Krüger C, Bauer J, Fäßling M, Stroux A, Schott E, Ruprecht K, Peters O *et al*  
603 (2018) Distinct expression of the neurotoxic microRNA family let-7 in the cerebrospinal fluid of patients with  
604 Alzheimer's disease. *PLoS one* 13: e0200602  
605 Dobin A, Davis CA, Schlesinger F, Drenkow J, Zaleski C, Jha S, Batut P, Chaisson M, Gingeras TR (2013)  
606 STAR: ultrafast universal RNA-seq aligner. *Bioinformatics* 13: 673–691  
607 Doyle M, Kiebler MA (2011) Mechanisms of dendritic mRNA transport and its role in synaptic tagging. *EMBO*  
608 *J* 30: 3540–3552  
609 El Fatimy R, Li S, Chen Z, Mushannen T, Gongala S, Wei Z, Balu DT, Rabinovsky R, Cantlon A, Elkhail A *et al*  
610 (2018) MicroRNA-132 provides neuroprotection for tauopathies via multiple signaling pathways. *Acta*  
611 *Neuropathol* 136: 537–555  
612 Farris S, Ward JM, Carstens KE, Samadi M, Wang, Y., Dudek SM (2019) Hippocampal Subregions Express  
613 Distinct Dendritic Transcriptomes that Reveal Differences in Mitochondrial Function in CA2. *Cell reports* 29:  
614 522–539  
615 Fonkeu Y, Kraynyukova N, Hafner AS, Kochen L, Sartori F, Schuman EM, Tchumatchenko T (2019) How  
616 mRNA Localization and Protein Synthesis Sites Influence Dendritic Protein Distribution and Dynamics. *Neuron*  
617 103: 1109–1122  
618 Friedländer MR, Mackowiak SD, Li N, Chen W, Rajewsky N (2012) miRDeep2 accurately identifies known and  
619 hundreds of novel microRNA genes in seven animal clades. *Nucleic acids research* 40: 37–52  
620 Gamer CC, Tucker RP, Matus A (1988) Selective localization of messenger RNA for cytoskeletal protein MAP2  
621 in dendrites. *Nature biotechnology*, 336: :674–677  
622 Griffiths-Jones S (2006) miRBase: the microRNA sequence database. *Methods in molecular biology*: 129–138  
623 Gurtan AM, Sharp PA (2013) The Role of miRNAs in Regulating Gene Expression Networks. *J Mol Biol* pii:  
624 Epub ahead of print  
625 Hafner AS, Donlin-Asp, P. G., Leitch, B., Herzog, E., & Schuman, E. M. (2019). Local protein synthesis is a  
626 ubiquitous feature of neuronal pre- and postsynaptic compartments. *Science* (New York, N.Y.), 364(6441),  
627 eaau3644. (2019) Local protein synthesis is a ubiquitous feature of neuronal pre- and postsynaptic  
628 compartments. . *Science* 364: eaau3644  
629 Hefter D, Ludewig S, Draguhn A, Korte M (2020) Amyloid, APP, and Electrical Activity of the Brain. . *The*  
630 *Neuroscientist* 26: 231–251  
631 Holt CE, Martin KC, Schuman EML *in* *Nature*, 26(7), 557–566. (2019) *Nature structural & molecular biology*  
632 26: 557–566.  
633 Jain G, Stüendl A, Rao P, Berulava T, Pena Centeno T, Kaurani L, Burkhardt S, Delalle I, Kornhuber J, Hüll M  
634 *et al* (2019) A combined miRNA-piRNA signature to detect Alzheimer's disease. . *Translational Psychiatry* 9:  
635 250  
636 Jose AM (2015) Movement of regulatory RNA between animal cells. . *Genesis* 53: 395–416  
637 Jovičić A, Roshan R, Moiso N, Pradervand S, Moser R, Pillai B, Luthi-Carter R (2013) Comprehensive  
638 expression analyses of neural cell-type-specific miRNAs identify new determinants of the specification and  
639 maintenance of neuronal phenotypes. *J Neurosci* 33: 5127–5137  
640 Karagkouni D, Paraskevopoulou MD, Chatzopoulos S, Vlachos IS, Tastsoglou S, Kanellos I, Papadimitriou D,  
641 Kavakiotis I, Manioudis S, Skoufos G *et al* (2018) DIANA-TarBase v8: a decade-long collection of experimentally  
642 supported miRNA-gene interactions. . *Nucleic acids research* 46: D239–D245  
643 Kosik KS (2016) Low Copy Number: How Dendrites Manage with So Few mRNAs. *Neuron* 92: 1168–1180  
644 Kye MJ, Liu T, Levy SF, Xu NL, Groves BB, Bonneau R, Lao K, Kosik KS (2007) Somatodendritic  
645 microRNAs identified by laser capture and multiplex RT-PCR. *RNA* 13: 1224–1234  
646 Langmead B, Salzberg SL (2012) Fast gapped-read alignment with Bowtie 2. *Nat Methods* 9: 357–359  
647 Liao Y, Smyth GK, Shi W (2014) featureCounts: an efficient general purpose program for assigning sequence  
648 reads to genomic features. *Bioinformatics* 30: 923–930  
649 Liu Y, Zhang Y, Liu P, Bai H, Li X, Xiao J, Yuan Q, Geng S, Yin H, Zhang H *et al* (2019) MicroRNA-128  
650 knockout inhibits the development of Alzheimer's disease by targeting PPAR $\gamma$  in mouse models. *European*  
651 *journal of pharmacology* 843: 132–144  
652 Liu ZP, Wu C, Miao H, Wu H (2015) RegNetwork: an integrated database of transcriptional and post-  
653 transcriptional regulatory networks in human and mouse. *Database : the journal of biological databases and*  
654 *curatio* bav095  
655 Love MI, Huber W, Anders S (2014) Moderated estimation of fold change and dispersion for RNA-seq data with  
656 DESeq2. *Genome Biol* 15: 550  
657 Lugli G, Torvik VI, Larson J, Smalheiser NR (2008) Expression of microRNAs and their precursors in synaptic  
658 fractions of adult mouse forebrain. *J Neurochem* 106: 650–661  
659 Most D, Ferguson L, Blednov Y, Mayfield RD, Harris RA (2015) The synaptoneurosome transcriptome: a  
660 model for profiling the emolecular effects of alcohol. *The pharmacogenomics journal* 15: 177–188

661 Plog BA, Nedergaard M (2018) The glymphatic system in CNS health and disease: past, present and future.  
662 *Annu Rev Pathol* 24: 379-394  
663 Prada I, Gabrielli M, Turola E, Iorio A, D'Arrigo G, Parolisi R, De Luca M, Pacifici M, Bastoni M, Lombardi M  
664 *et al* (2018) Glia-to-neuron transfer of miRNAs via extracellular vesicles: a new mechanism underlying  
665 inflammation-induced synaptic alterations. *Acta neuropathologica*, 135: 529-550  
666 Rajman M, Schratt G (2017) MicroRNAs in neural development: from master regulators to fine-tuners.  
667 *Development* 44: 2310-2322  
668 Rao P, Benito E, Fischer A (2013) MicroRNAs as biomarkers for CNS disease. *Front Mol Neurosci* 26:  
669 eCollection 2013  
670 Risso D, Ngai J, Speed TP, Dudoit S (2014) Normalization of RNA-seq data using factor analysis of control  
671 genes or samples. *Nature biotechnology* 32: 896  
672 Rupaimoole R, Slack F, J. (2017) MicroRNA therapeutics: towards a new era for the management of cancer and  
673 other diseases. *Nat Rev Drug Discov* 16: 203-222  
674 Sambandan S, Akbalik G, Kochen L, Rinne J, Kahlstatt J, Glock C, Tushev G, Alvarez-Castelao B, Heckel A,  
675 Schuman EM (2017) Activity-dependent spatially localized miRNA maturation in neuronal dendrites. *Science*  
676 355: 634-637  
677 Shannon P, Markiel A, Ozier O, Baliga NS, Wang JT, Ramage D, Amin N, Schwikowski B, Ideker T (2003)  
678 Cytoscape: a software environment for integrated models of biomolecular interaction networks. *Genome*  
679 *research* 13: 2498.2504  
680 Smalheiser NR (2014) The RNA-centred view of the synapse: non-coding RNAs and synaptic plasticity. *Philos*  
681 *Trans R Soc Lond B Biol Sci* 369: pii: 20130504  
682 Smalheiser NR, Lugli G, Zhang H, Rizavi H, Cook EH, Dwivedi Y (2014) Expression of microRNAs and other  
683 small RNAs in prefrontal cortex in schizophrenia, bipolar disorder and depressed subjects. *PLoS One* 9: e86469  
684 Smythies J, Edelstein L (2013) Transsynaptic modality codes in the brain: possible involvement of synchronized  
685 spike timing, microRNAs, exosomes and epigenetic processes. *Frontiers in integrative neuroscience* 6:  
686 <https://doi.org/10.3389/fnint.2012.00126>  
687 Sotelo JR, Canclini L, Kun A, Sotelo-Silveira JR, Calliari A, Cal K, Bresque M, Dipaolo A, Farias J, Mercer JA  
688 (2014) Glia to axon RNA transfer. *Developmental neurobiology* 73: 292-302  
689 Stepniak B, Kästner A, Poggi G, Mitjans M, Begemann M, Hartmann A, Van der Auwera S, Sananbenesi F,  
690 Krueger-Burg D, Matuszko G *et al* (2015) Accumulated common variants in the broader fragile X gene family  
691 modulate autistic phenotypes. *EMBO Mol Med* 7: 1565-1579  
692 Szklarczyk D, Gable AL, Lyon D, Junge A, Wyder S, Huerta-Cepas J, Simonovic M, Doncheva NT, Morris JH,  
693 Bork P *et al* (2019) STRING v11: protein-protein association networks with increased coverage, supporting  
694 functional discovery in genome-wide experimental datasets. *Nucleic Acids Res* 47: D607-D613  
695 Taylor AM, Dieterich DC, Ito HT, Kim SA, Schuman EM (2010) Microfluidic local perfusion chambers for the  
696 visualization and manipulation of synapses. *Neuron*, 66(1), 57-68 66: 57-68  
697 Teng X, Chen X, Xue H, Tang Y, Zhang P, Kang Q, Hao Y, Chen R, Zhao Y, He S (2020) NPInter v4.0: an  
698 integrated database of ncRNA interactions. *Nucleic acids research* 48: 160-165  
699 Tong Z, Cui Q, Wang J, Zhou Y (2019) TransmiR v2.0: an updated transcription factor-microRNA regulation  
700 database. *Nucleic acids research* 47: D253-D258  
701 Valadi H EK, Bossios A, Sjöstrand M, Lee JJ, Lötvald JO. (2007) Exosome-mediated transfer of mRNAs and  
702 microRNAs is a novel mechanism of genetic exchange between cells. *Nat Cell Biol* 9: 654-659  
703 Weiss K, Antoniou A, Schratt G (2015) Non-coding mechanisms of local mRNA translation in neuronal  
704 dendrites. *European journal of cell biology* 94: 363-367  
705 Xu J, Chen Q, Zen K, Zhang C, Zhang Q (2013) Synaptosomes secrete and uptake functionally active  
706 microRNAs via exocytosis and endocytosis pathways. *J Neurochem* 124: 15-25  
707 Yoshihama M, Nakao A, Kenmochi N (2013) snOPY: a small nucleolar RNA orthological gene database. *BMC*  
708 *research notes* 6  
709



A

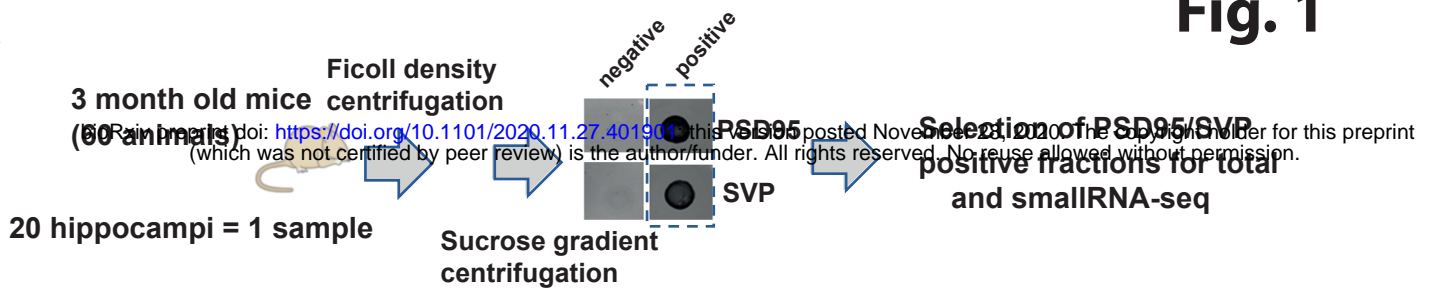

B

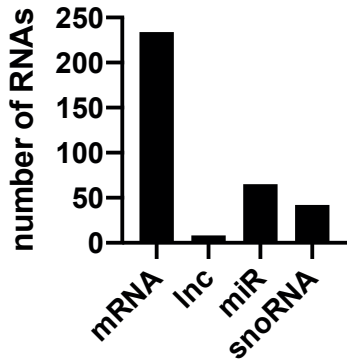

C

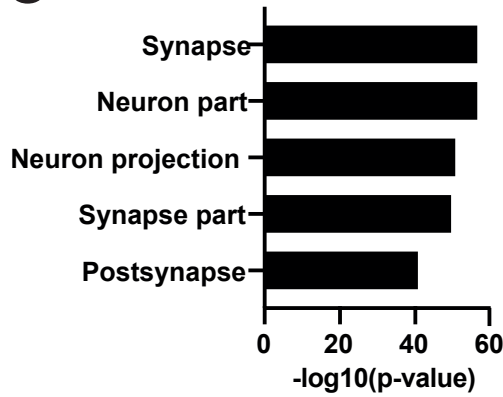

F

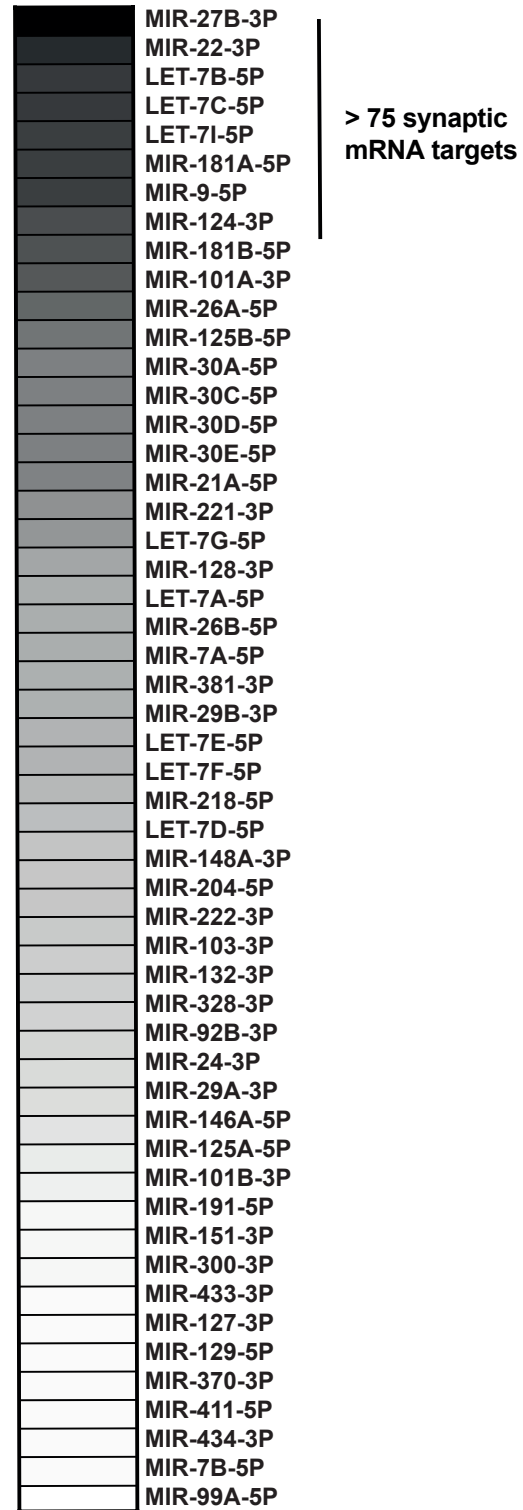

D

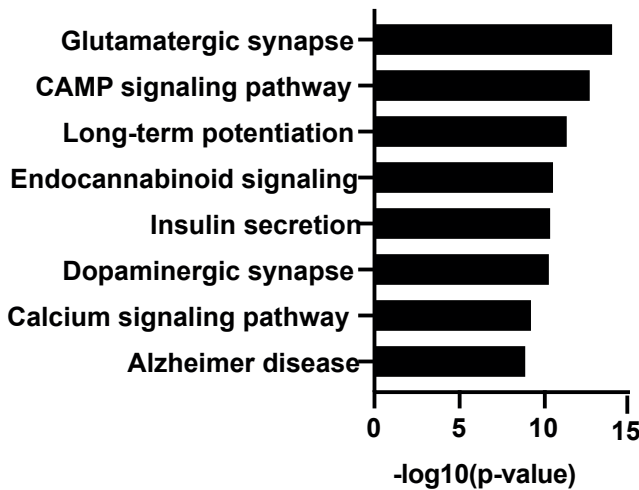

E

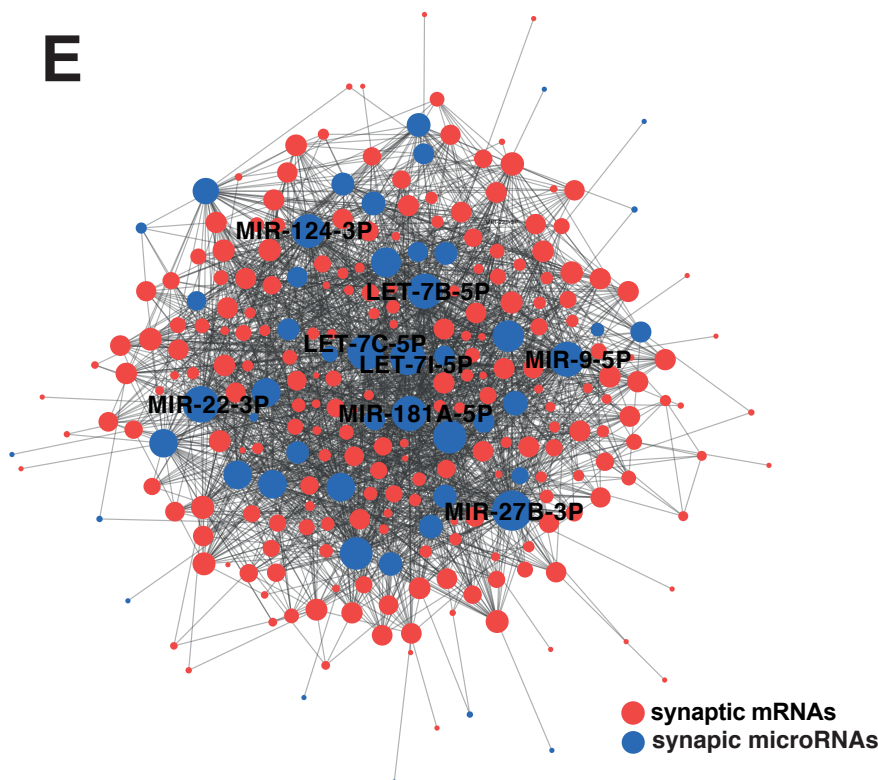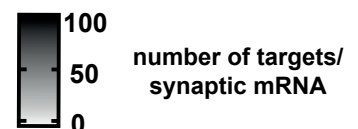

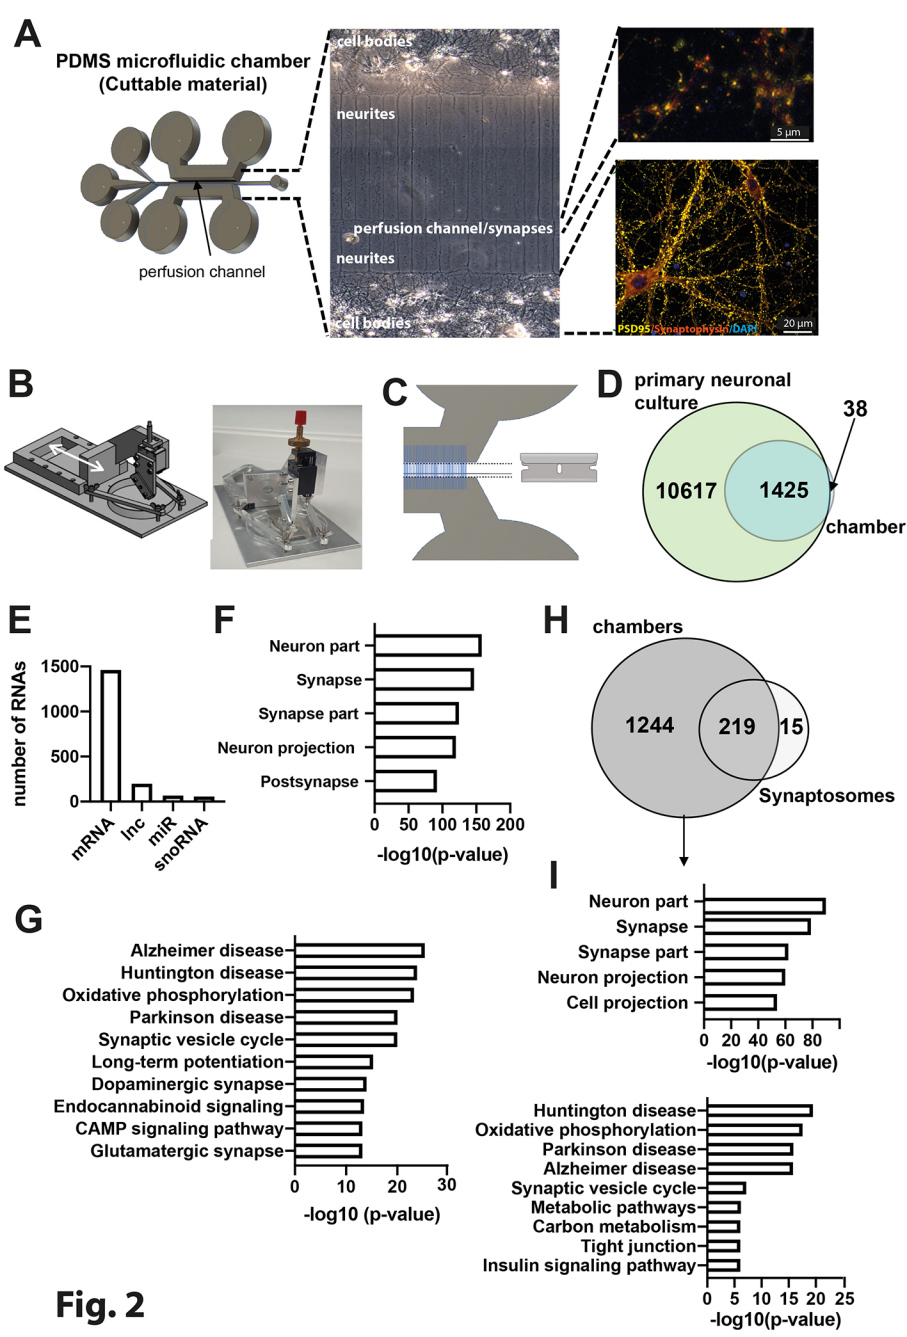

**Fig. 2**

**Fig. 3**

**A**

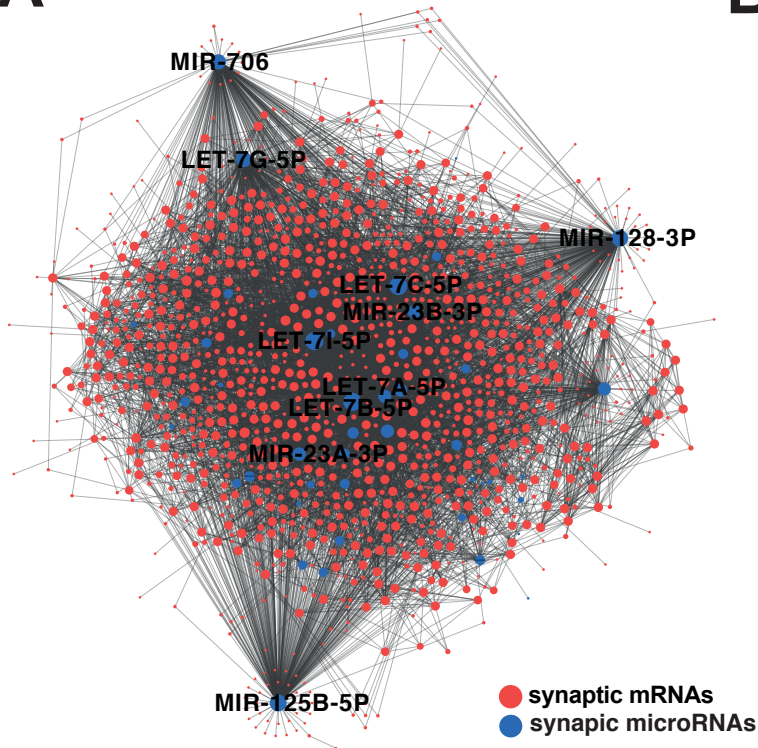

**B**

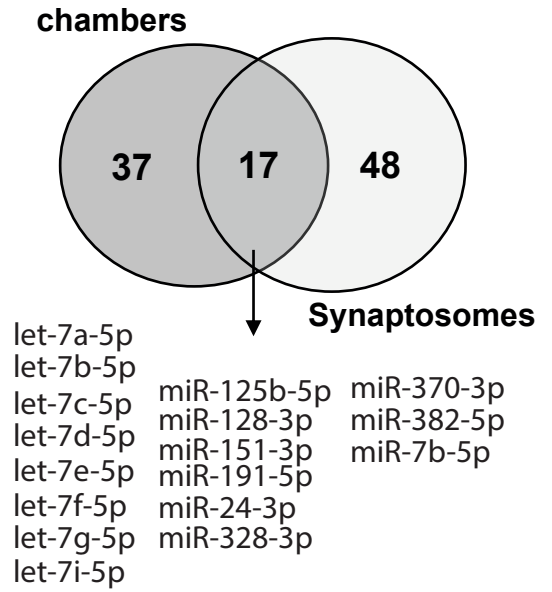

**C**

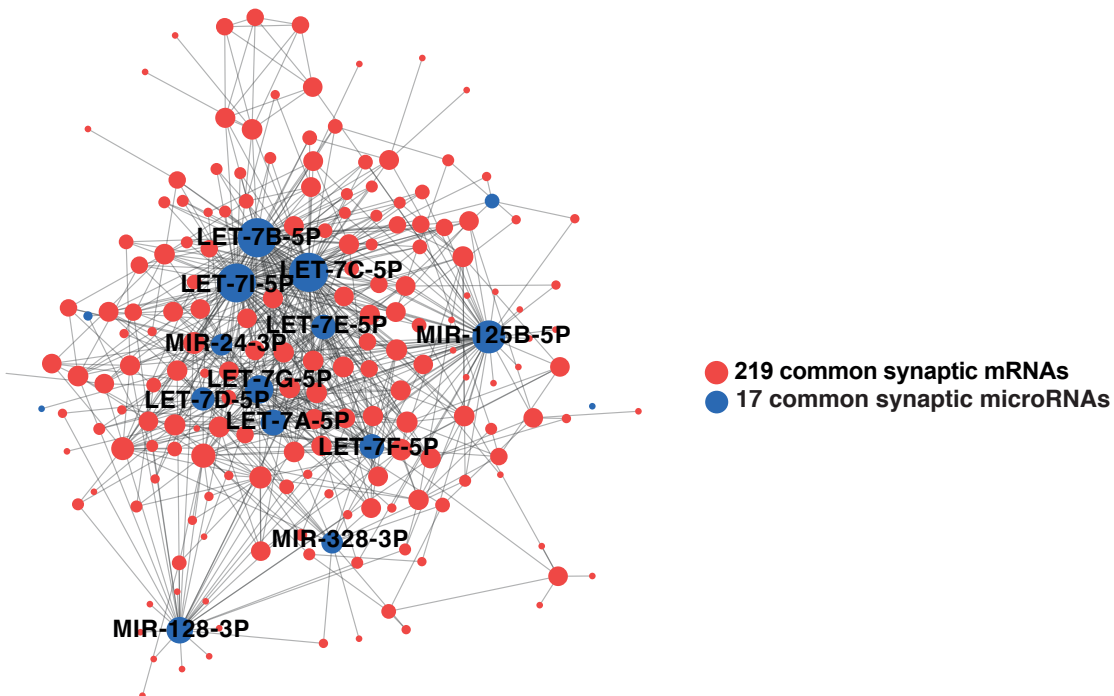



**A**

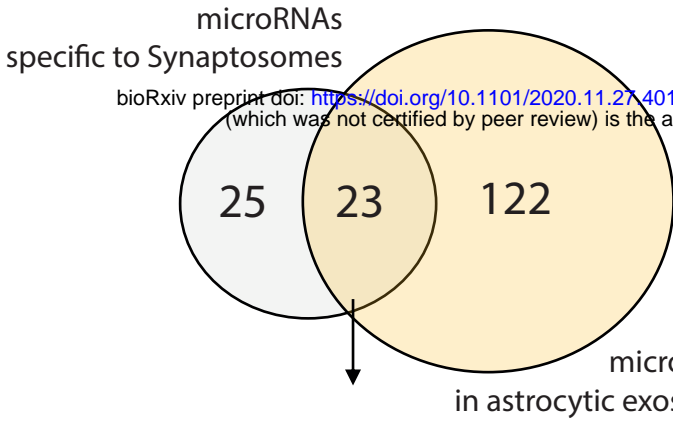

- |            |            |             |
|------------|------------|-------------|
| miR-99b-5p | miR-30c-5p | miR-222-3p  |
| miR-9-5p   | miR-30a-5p | miR-221-3p  |
| miR-7a-5p  | miR-132-3p | miR-218-5p  |
| miR-434-3p | miR-29a-3p | miR-146a-5p |
| miR-411-5p | miR-29b-3p | miR-127-3p  |
| miR-381-3p | miR-27b-3p | miR-101b-3p |
| miR-30e-5p | miR-26a-5p | miR-100-5p  |
| miR-30d-5p | miR-26b-5p |             |

**B**

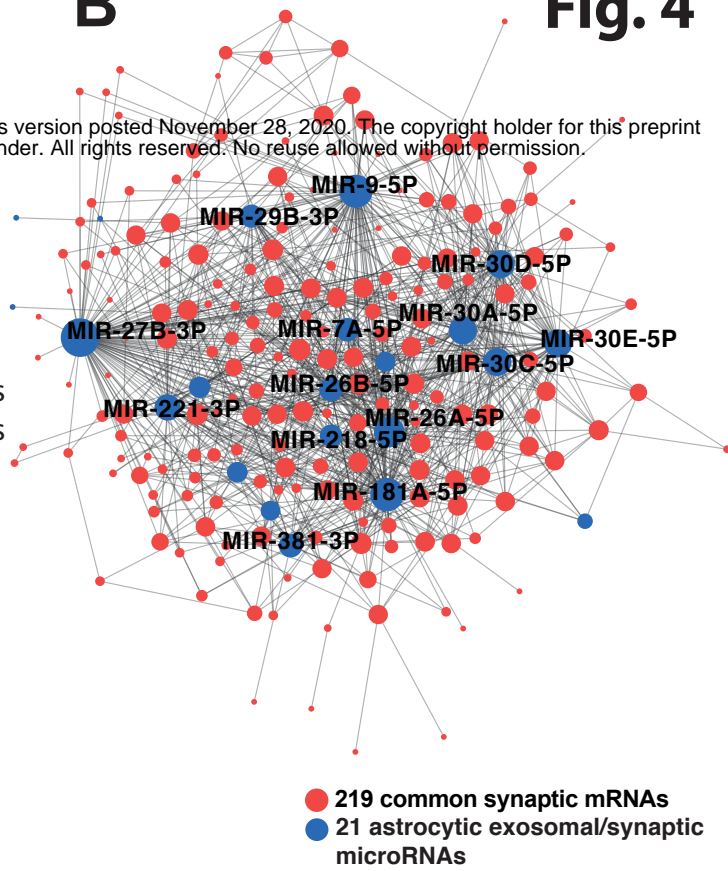

**C**

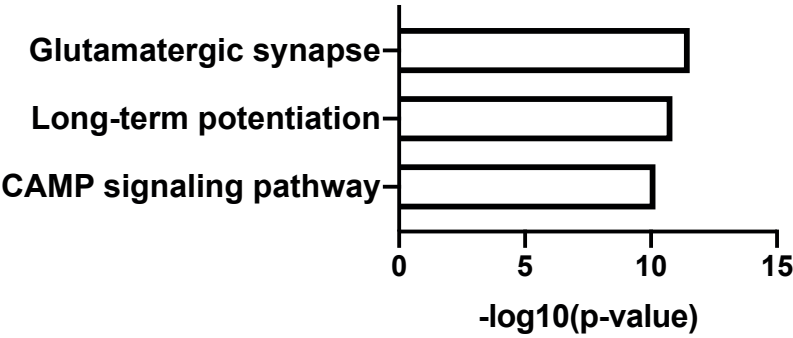

**D**

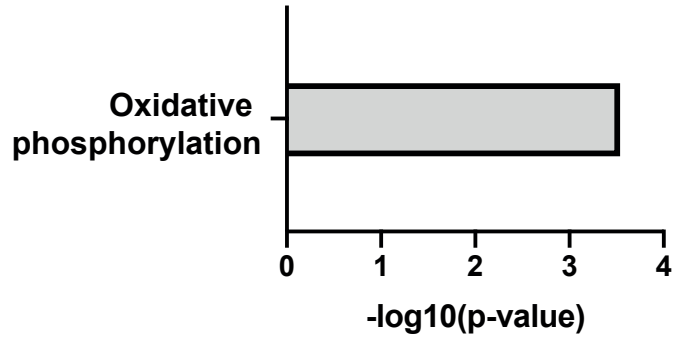

## A

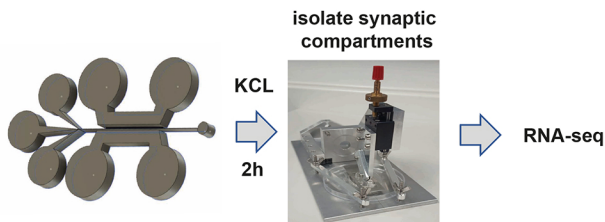

## B

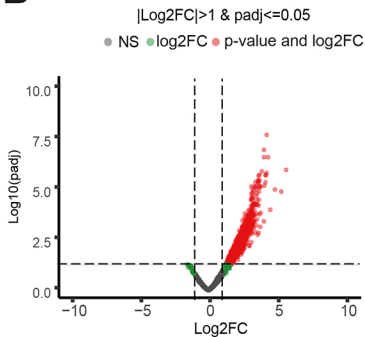

## C

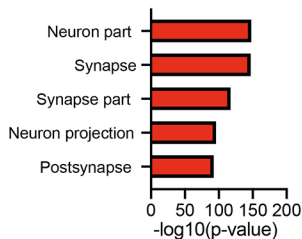

## D

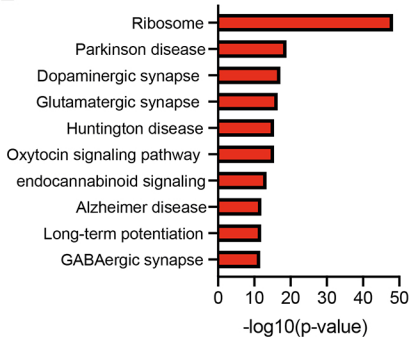

## E

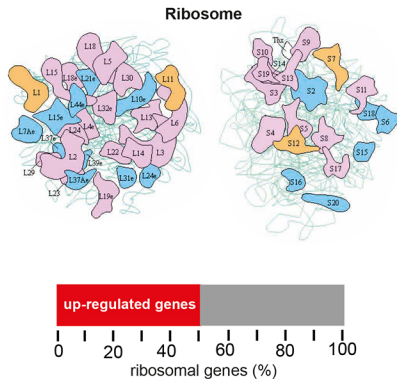

Source: https://www.biorxiv.org/content/biorxiv/early/2020/11/28/2020.11.27.401901.full.pdf
